# Supplementary material for: Effects of rootstocks on the flavor quality of huanglongbing-affected sweet orange juices using targeted flavoromics strategy
Source: Royal Society of Chemistry journal article supplement (doi:10.1039/d2ra08182b), 2023-01-01
Supplement: d2ra08182b1.pdf [file d2ra08182b1.pdf]

## Supplementary Material

### Effects of rootstocks on the flavor quality of Huanglongbing-affected sweet orange juices using targeted flavoromics strategy

Xin Liu <sup>a,b</sup>, Frederick G. Gmitter Jr <sup>a</sup>, Jude W. Grosser <sup>a</sup>, Yu Wang <sup>a,b\*</sup>

<sup>a</sup> *Citrus Research and Education Center, University of Florida, Lake Alfred, Florida  
33850, USA*

<sup>b</sup> *Department of Food Science and Human Nutrition, University of Florida, Gainesville,  
Florida 32611, USA*

---

\* Corresponding author

*E-mail address:* [yu.wang@ufl.edu](mailto:yu.wang@ufl.edu) (Yu Wang).

## Reference compounds information

The external standards used for quantitation on Poroshell HILIC-Z column are amino acids (phenylalanine, tryptophan, leucine, isoleucine, methionine, valine, tyrosine, proline, alanine, threonine, glycine, glutamic acid, serine, glutamine, asparagine, aspartic acid, arginine, and theanine), nucleotides and nucleosides (adenine, guanine, xanthine, hypoxanthine, uracil, thymine, cytosine, adenosine, guanosine, 5-methyluridine, uridine, 5-methylcytidine, cytidine, inosine, xanthosine, 2'-deoxyadenosine, 2'-deoxyguanosine, thymidine, 2'-deoxyuridine, 2'-deoxycytidine, 2'-deoxyinosine, adenosine-5'-monophosphate, guanosine-5'-monophosphate, uridine 5'-monophosphate, cytidine-5'-monophosphate, inosine-5'-monophosphate, xanthosine-5'-monophosphate, 2'-deoxyadenosine 5'-monophosphate, 2'-deoxyguanosine 5'-monophosphate, thymidine 5'-monophosphate, 2'-deoxyuridine 5'-monophosphate, 2'-deoxycytidine-5'-monophosphate, 2'-deoxyinosine-5'-monophosphate, adenosine 3',5'-cyclic monophosphate, guanosine 3',5'-cyclic monophosphate, adenosine 5'-diphosphate, guanosine 5'-diphosphate, uridine-5'-diphosphate, cytidine-5'-diphosphate, 2'-deoxyadenosine-5'-diphosphate, 2'-deoxyguanosine 5'-diphosphate, 2'-deoxythymidine-5'-diphosphate, 2'-deoxycytidine 5'-diphosphate, adenosine 5'-triphosphate, guanosine-5'-triphosphate, uridine-5'-triphosphate, cytidine-5'-triphosphate, inosine-5'-triphosphate, 2'-deoxyadenosine-5'-triphosphate, 2'-deoxyguanosine-5'-triphosphate, thymidine-5'-triphosphate, 2'-deoxyuridine-5'-triphosphate, 2'-deoxycytidine-5'-triphosphate), organic acids (quinic acid, shikimic acid, ascorbic acid, pyruvic acid, malonic acid, succinic acid,  $\alpha$ -ketoglutaric acid,

fumaric acid, glutaric acid, ferulic acid, vanillic acid, coumaric acid, cinnamic acid, maleic acid), sugars and sugar alcohols (rhamnose, sucrose, maltose, melibiose, raffinose, sorbitol, mannitol, xylose, arabinose, glucose, fructose, myo-inositol, erythritol, arabitol, xylitol, trehalose, trehalose-6-phosphate, glucose-6-phosphate, and fructose-6-phosphate).

The external standards used for quantitation on Acclaim™ C30 column are amino acids (histidine, lysine, and cysteine), flavonoids, limonoids (taxifolin, rutin, neohesperidin, hesperidin, didymin, naringin, narirutin, diosmetin, neodiosmin, diosmin, eriodictyol, eriocitrin, neoeriocitrin, apigenin, rhoifolin, scutellarein, nobiletin, 5,6,7,3',4',5'-hexamethoxyflavone, sinensetin, tangeretin, luteolin, limonin, and nomilin), and organic acids (cinnamic acid, salicylic acid, benzoic acid, abscisic acid, methyl salicylate, 2,3-dihydroxybenzoic acid, salicylic acid 2-O- $\beta$ -D-glucoside, gentisic acid, tartaric acid, malic acid, isocitric acid, citric acid, oxaloacetic acid, gallic acid, and uric acid).

Table S1. Relative concentration of nonvolatile compounds in six different rootstocks groups (mg/L)

| Compound      | 1804                          | Blue                          | CH                            | FG                           | SW                           | Volk                          |
|---------------|-------------------------------|-------------------------------|-------------------------------|------------------------------|------------------------------|-------------------------------|
| phenylalanine | 977.18 ± 37.95 <sup>abc</sup> | 935.75 ± 55.54 <sup>abd</sup> | 1024.55 ± 38.91 <sup>ac</sup> | 889.75 ± 18.51 <sup>d</sup>  | 920.35 ± 36.58 <sup>d</sup>  | 999.77 ± 46.76 <sup>abc</sup> |
| tryptophan    | 75.33 ± 1.2 <sup>a</sup>      | 66.62 ± 1.47 <sup>b</sup>     | 90.23 ± 1.97 <sup>c</sup>     | 64.98 ± 2.24 <sup>b</sup>    | 77.27 ± 2.65 <sup>a</sup>    | 83.4 ± 4.06 <sup>d</sup>      |
| leucine       | 70.37 ± 1.84 <sup>a</sup>     | 66.7 ± 2.41 <sup>b</sup>      | 82.05 ± 1.75 <sup>c</sup>     | 63.9 ± 2.18 <sup>b</sup>     | 82.13 ± 2.62 <sup>c</sup>    | 73.78 ± 2.49 <sup>d</sup>     |
| methionine    | 30.28 ± 1.06 <sup>a</sup>     | 25.92 ± 1.06 <sup>b</sup>     | 33.32 ± 0.48 <sup>c</sup>     | 28.92 ± 1.04 <sup>d</sup>    | 31.93 ± 1.24 <sup>e</sup>    | 34.4 ± 1.18 <sup>c</sup>      |
| valine        | 5.95 ± 0.19 <sup>a</sup>      | 6.33 ± 0.21 <sup>b</sup>      | 10.33 ± 0.23 <sup>c</sup>     | 5.42 ± 0.19 <sup>d</sup>     | 7.65 ± 0.19 <sup>e</sup>     | 6.45 ± 0.19 <sup>b</sup>      |
| tyrosine      | 25.08 ± 0.96 <sup>a</sup>     | 19.52 ± 1.13 <sup>b</sup>     | 27.25 ± 1.16 <sup>c</sup>     | 18.5 ± 0.98 <sup>b</sup>     | 23.47 ± 1.1 <sup>d</sup>     | 25.42 ± 1.01 <sup>a</sup>     |
| proline       | 421.88 ± 65.24 <sup>a</sup>   | 400.68 ± 49.13 <sup>a</sup>   | 682.68 ± 34.94 <sup>c</sup>   | 368.44 ± 50.76 <sup>ad</sup> | 505.92 ± 73.61 <sup>ae</sup> | 383.48 ± 54.32 <sup>a</sup>   |
| alanine       | 12.25 ± 0.45 <sup>a</sup>     | 10.7 ± 0.35 <sup>b</sup>      | 21.27 ± 0.72 <sup>c</sup>     | 12.97 ± 0.64 <sup>d</sup>    | 14.68 ± 0.44 <sup>e</sup>    | 14 ± 0.41 <sup>f</sup>        |
| threonine     | 1.05 ± 0.54 <sup>a</sup>      | 1.42 ± 0.5 <sup>ab</sup>      | 3.1 ± 0.13 <sup>c</sup>       | 0.97 ± 0.05 <sup>bd</sup>    | 1.68 ± 0.08 <sup>b</sup>     | 1.57 ± 0.39 <sup>abd</sup>    |
| glutamic acid | 26.25 ± 0.69 <sup>a</sup>     | 23.08 ± 0.66 <sup>b</sup>     | 33.67 ± 1.28 <sup>c</sup>     | 24.72 ± 1.01 <sup>d</sup>    | 28.08 ± 1.34 <sup>e</sup>    | 27.07 ± 1.09 <sup>ae</sup>    |
| serine        | 14.35 ± 0.31 <sup>a</sup>     | 14.28 ± 0.42 <sup>ab</sup>    | 21.5 ± 0.51 <sup>c</sup>      | 13.18 ± 0.5 <sup>d</sup>     | 16.07 ± 0.76 <sup>e</sup>    | 13.57 ± 0.48 <sup>d</sup>     |
| glutamine     | 5.22 ± 0.17 <sup>a</sup>      | 5.4 ± 0.15 <sup>a</sup>       | 6.03 ± 0.18 <sup>b</sup>      | 4.6 ± 0.2 <sup>c</sup>       | 6.5 ± 0.21 <sup>d</sup>      | 5.75 ± 0.1 <sup>e</sup>       |
| asparagine    | 46.12 ± 0.97 <sup>a</sup>     | 40.62 ± 1.02 <sup>b</sup>     | 81.75 ± 3.16 <sup>c</sup>     | 33.05 ± 1.44 <sup>d</sup>    | 53.58 ± 2.12 <sup>e</sup>    | 38.48 ± 0.92 <sup>f</sup>     |
| aspartic acid | 25.35 ± 0.9 <sup>a</sup>      | 25.67 ± 1.67 <sup>ab</sup>    | 41.58 ± 2.25 <sup>c</sup>     | 22.78 ± 1.28 <sup>d</sup>    | 28.07 ± 2.06 <sup>be</sup>   | 22.63 ± 0.85 <sup>d</sup>     |
| arginine      | 459.22 ± 55.32 <sup>a</sup>   | 517.94 ± 49.15 <sup>ab</sup>  | 778.08 ± 97.9 <sup>c</sup>    | 437.06 ± 18.71 <sup>a</sup>  | 591.23 ± 25.23 <sup>bc</sup> | 463.96 ± 41.05 <sup>ab</sup>  |
| lysine        | 3.13 ± 0.12 <sup>a</sup>      | 3.22 ± 0.12 <sup>a</sup>      | 5.9 ± 0.18 <sup>b</sup>       | 2.47 ± 0.1 <sup>c</sup>      | 4.13 ± 0.16 <sup>d</sup>     | 3.5 ± 0.13 <sup>e</sup>       |
| histidine     | 0.58 ± 0.15                   | 0.7 ± 0.17                    | 0.78 ± 0.3                    | 0.67 ± 0.23                  | 0.73 ± 0.21                  | 0.77 ± 0.2                    |
| adenine       | 2.8 ± 0.06 <sup>a</sup>       | 2.35 ± 0.1 <sup>b</sup>       | 3.42 ± 0.12 <sup>c</sup>      | 2.32 ± 0.1 <sup>b</sup>      | 3.08 ± 0.22 <sup>d</sup>     | 2.85 ± 0.16 <sup>ad</sup>     |
| cytosine      | 17.97 ± 0.61 <sup>a</sup>     | 16.27 ± 0.61 <sup>b</sup>     | 9.9 ± 0.24 <sup>c</sup>       | 15.5 ± 0.67 <sup>bd</sup>    | 15.35 ± 4.7 <sup>abde</sup>  | 13.32 ± 2.29 <sup>e</sup>     |
| adenosine     | 116.6 ± 9.55 <sup>a</sup>     | 91.42 ± 3.96                  | 93.75 ± 7.6                   | 93.13 ± 3.76                 | 120.67 ± 14.47 <sup>a</sup>  | 94.1 ± 9.06                   |
| guanosine     | 5.72 ± 2.82 <sup>a</sup>      | 5.27 ± 0.15 <sup>b</sup>      | 7.15 ± 0.33 <sup>a</sup>      | 4.47 ± 0.21 <sup>c</sup>     | 8.85 ± 0.46 <sup>d</sup>     | 5.38 ± 0.95 <sup>b</sup>      |
| uridine       | 12.55 ± 0.37 <sup>a</sup>     | 9.65 ± 0.36 <sup>b</sup>      | 9.42 ± 4.62 <sup>c</sup>      | 9.22 ± 0.46 <sup>b</sup>     | 14.52 ± 1.52 <sup>d</sup>    | 9.92 ± 0.67 <sup>b</sup>      |
| cytidine      | 21.7 ± 0.64 <sup>a</sup>      | 18.3 ± 0.51 <sup>b</sup>      | 20.62 ± 0.27 <sup>c</sup>     | 17.05 ± 0.73 <sup>d</sup>    | 23.68 ± 0.67 <sup>e</sup>    | 16.92 ± 0.62 <sup>d</sup>     |
| quinic acid   | 519.1 ± 27.97 <sup>a</sup>    | 279.06 ± 21.32 <sup>b</sup>   | 342.6 ± 25.68 <sup>b</sup>    | 465.57 ± 33.7 <sup>a</sup>   | 281.12 ± 24.96 <sup>b</sup>  | 342.97 ± 35.48 <sup>b</sup>   |

|                     |                              |                               |                               |                                |                              |                                |
|---------------------|------------------------------|-------------------------------|-------------------------------|--------------------------------|------------------------------|--------------------------------|
| shikimic acid       | 16.8 ± 0.74 <sup>a</sup>     | 16.63 ± 0.33 <sup>ab</sup>    | 17.4 ± 0.7 <sup>ac</sup>      | 14.67 ± 1.24 <sup>d</sup>      | 13.12 ± 0.38 <sup>e</sup>    | 17.2 ± 0.76 <sup>abc</sup>     |
| ferulic acid        | 4.67 ± 0.85 <sup>a</sup>     | 2.6 ± 0.59 <sup>b</sup>       | 3.27 ± 0.37 <sup>c</sup>      | 4.27 ± 0.3 <sup>ad</sup>       | 5.12 ± 0.52 <sup>ae</sup>    | 5.37 ± 0.56 <sup>ade</sup>     |
| maleic acid         | 2.77 ± 0.12 <sup>a</sup>     | 2.77 ± 0.27 <sup>ab</sup>     | 3.37 ± 0.18 <sup>c</sup>      | 2.48 ± 0.26 <sup>b</sup>       | 3.05 ± 0.33 <sup>abc</sup>   | 3.42 ± 0.39 <sup>abce</sup>    |
| malonic acid        | 17.18 ± 0.67 <sup>a</sup>    | 20.47 ± 0.78 <sup>b</sup>     | 17.87 ± 0.54 <sup>ac</sup>    | 16.7 ± 0.62 <sup>ad</sup>      | 20.25 ± 3.35 <sup>abc</sup>  | 21.4 ± 0.81 <sup>b</sup>       |
| benzoic acid        | 0.33 ± 0.15 <sup>ab</sup>    | 0.38 ± 0.1 <sup>a</sup>       | 0.4 ± 0.09 <sup>a</sup>       | 0.37 ± 0.05 <sup>a</sup>       | 0.5 ± 0.09 <sup>b</sup>      | 0.32 ± 0.04 <sup>c</sup>       |
| pyruvic acid        | 84.58 ± 19.98 <sup>a</sup>   | 98.4 ± 28.19 <sup>b</sup>     | 106.48 ± 34.2 <sup>b</sup>    | 78.47 ± 21.23 <sup>b</sup>     | 89.55 ± 27.52 <sup>ac</sup>  | 85.28 ± 25.28 <sup>c</sup>     |
| abscisic acid       | 10.15 ± 1.52 <sup>a</sup>    | 13.6 ± 3.51 <sup>ab</sup>     | 14.37 ± 2.63 <sup>b</sup>     | 14.42 ± 1.4 <sup>b</sup>       | 15.52 ± 0.83 <sup>b</sup>    | 15.67 ± 2.55 <sup>b</sup>      |
| tartaric acid       | 2.2 ± 0.34                   | 3.33 ± 1.07                   | 4.47 ± 0.77 <sup>a</sup>      | 2.88 ± 0.84                    | 2.12 ± 0.65                  | 2.47 ± 0.77                    |
| ascorbic acid       | 2104.23 ± 115.04             | 2208.95 ± 185.37              | 2056.37 ± 153.58              | 1825.98 ± 177.99               | 1896.58 ± 163.68             | 1972.88 ± 150.81               |
| malic acid          | 13508.42 ± 384.09            | 12381.83 ± 530.56             | 10137.62 ± 121.11             | 10731.07 ± 74.6                | 11472.12 ± 479.59            | 12908.87 ± 879.55              |
| isocitric acid      | 23038.97 ± 563.52            | 22785.97 ± 738.85             | 31811.7 ± 1852.7              | 17598.88 ± 931.63 <sup>a</sup> | 23811.7 ± 518.7              | 23392.73 ± 699.45              |
| citric acid         | 60449.28 ± 1718.98           | 72651.43 ± 4010.59            | 67830.65 ± 5211.14            | 74543.42 ± 2338.04             | 72270.18 ± 2493.72           | 66771.77 ± 2020.95             |
| oxaloacetic acid    | 1.90 ± 0.58 <sup>ab</sup>    | 1.80 ± 0.89 <sup>ab</sup>     | 3.4 ± 1.8 <sup>abc</sup>      | 1.42 ± 0.35 <sup>a</sup>       | 1.37 ± 0.49 <sup>a</sup>     | 1.52 ± 0.34 <sup>a</sup>       |
| uric acid           | 28.00 ± 5.62 <sup>a</sup>    | 23.5 ± 7.31 <sup>ab</sup>     | 27.85 ± 7.02 <sup>a</sup>     | 19.65 ± 5.29 <sup>b</sup>      | 32.2 ± 7.87 <sup>a</sup>     | 33.3 ± 9.87 <sup>a</sup>       |
| rhamnose            | 2.03 ± 0.36 <sup>ad</sup>    | 1.87 ± 0.27 <sup>abd</sup>    | 2.62 ± 0.54 <sup>ac</sup>     | 1.82 ± 0.23 <sup>a</sup>       | 2.27 ± 0.42 <sup>ad</sup>    | 1.77 ± 0.05 <sup>a</sup>       |
| sucrose             | 13459.32 ± 439.66            | 12547.3 ± 502.51              | 14898.85 ± 863.42             | 15023.48 ± 654.61              | 13568.07 ± 678.69            | 15219.8 ± 631.44               |
| raffinose           | 23.02 ± 4.08 <sup>a</sup>    | 28.65 ± 4.8 <sup>abc</sup>    | 32.93 ± 5.79 <sup>b</sup>     | 18.42 ± 3.06 <sup>ad</sup>     | 31.47 ± 6.02 <sup>bc</sup>   | 23.97 ± 3.12 <sup>ab</sup>     |
| sorbitol            | 7.83 ± 0.51 <sup>a</sup>     | 9.18 ± 0.51 <sup>b</sup>      | 13.32 ± 0.55 <sup>c</sup>     | 7.33 ± 0.42 <sup>ad</sup>      | 9.4 ± 0.39 <sup>b</sup>      | 8.95 ± 0.38 <sup>b</sup>       |
| xylose              | 8.02 ± 0.43 <sup>a</sup>     | 8.43 ± 0.41 <sup>a</sup>      | 10.22 ± 0.82 <sup>b</sup>     | 6.25 ± 0.3 <sup>c</sup>        | 9.43 ± 0.43 <sup>b</sup>     | 8.42 ± 0.69 <sup>a</sup>       |
| glucose             | 1628.98 ± 92.89 <sup>a</sup> | 1780.62 ± 130.31 <sup>b</sup> | 2285.1 ± 121.02 <sup>c</sup>  | 1540.28 ± 101.98 <sup>a</sup>  | 1780.1 ± 83.52 <sup>b</sup>  | 1650.72 ± 175.08 <sup>ab</sup> |
| fructose            | 1309.3 ± 148.52 <sup>a</sup> | 1697.58 ± 123.12 <sup>b</sup> | 1282.93 ± 123.02 <sup>c</sup> | 1480.77 ± 106.61 <sup>a</sup>  | 1034.25 ± 85.16 <sup>d</sup> | 1043.25 ± 94.01 <sup>d</sup>   |
| myo-inositol        | 539.63 ± 92.5 <sup>a</sup>   | 922.65 ± 31.95 <sup>b</sup>   | 1232.88 ± 29.99 <sup>c</sup>  | 616.43 ± 57.82 <sup>a</sup>    | 869.83 ± 48.7 <sup>d</sup>   | 837.55 ± 59.27 <sup>d</sup>    |
| arabitol            | 2.4 ± 0.71 <sup>a</sup>      | 3.2 ± 0.09 <sup>b</sup>       | 3.68 ± 0.1 <sup>c</sup>       | 2.1 ± 1.06 <sup>a</sup>        | 3.8 ± 0.21 <sup>c</sup>      | 3.17 ± 0.41 <sup>d</sup>       |
| glucose-6-phosphate | 44.7 ± 3.49 <sup>a</sup>     | 42.62 ± 2.04 <sup>a</sup>     | 41.85 ± 2.6 <sup>a</sup>      | 35.08 ± 4.18 <sup>b</sup>      | 46.38 ± 7.3 <sup>ac</sup>    | 51.37 ± 3.15 <sup>cd</sup>     |
| rutin               | 4.5 ± 0.24                   | 4.37 ± 0.84                   | 4.83 ± 0.48                   | 4.88 ± 0.29                    | 4.67 ± 0.23                  | 4.7 ± 0.27                     |
| hesperidin          | 355.78 ± 24.68 <sup>a</sup>  | 408.52 ± 40.37 <sup>a</sup>   | 553.78 ± 21.2 <sup>b</sup>    | 455.78 ± 37.31 <sup>ab</sup>   | 440.52 ± 35.17 <sup>ab</sup> | 461.63 ± 43.97 <sup>ab</sup>   |

|            |                           |                             |                            |                            |                           |                           |
|------------|---------------------------|-----------------------------|----------------------------|----------------------------|---------------------------|---------------------------|
| didymin    | 36.08 ± 1.95 <sup>a</sup> | 51.3 ± 9.82 <sup>b</sup>    | 74.55 ± 4.7 <sup>c</sup>   | 46.75 ± 2.03 <sup>b</sup>  | 44.43 ± 2.49 <sup>b</sup> | 47.28 ± 1.39 <sup>b</sup> |
| narirutin  | 68.52 ± 5.21 <sup>a</sup> | 114.13 ± 16.63 <sup>b</sup> | 137.9 ± 10.21 <sup>c</sup> | 83.93 ± 8.46 <sup>d</sup>  | 86.32 ± 7.37 <sup>d</sup> | 60.92 ± 6.53 <sup>a</sup> |
| eriocitrin | 12.02 ± 1.82              | 9.82 ± 2.24                 | 10.78 ± 1.41               | 11.28 ± 2.4                | 10.92 ± 0.96              | 11.02 ± 2.66              |
| nobiletin  | 26.33 ± 8.37              | 30.82 ± 7.49                | 26.45 ± 8.92               | 31.6 ± 11.2                | 29.72 ± 8.08              | 32.18 ± 6.96              |
| sinensetin | 17.85 ± 5.53              | 22.1 ± 4.29                 | 17.22 ± 6.37               | 18.12 ± 9.46               | 18.18 ± 5.32              | 24.08 ± 6.52              |
| tangeretin | 9.42 ± 3.23               | 8.82 ± 2.13                 | 7.8 ± 2.98                 | 11.08 ± 4.16               | 10.03 ± 3.52              | 11.8 ± 3.67               |
| limonin    | 33.23 ± 2.15 <sup>a</sup> | 38.24 ± 1.89 <sup>a</sup>   | 40.23 ± 3.74 <sup>a</sup>  | 37.26 ± 2.25 <sup>ab</sup> | 49.87 ± 3.75 <sup>c</sup> | 32.67 ± 4.02 <sup>a</sup> |

Data are expressed as means ± the standard error (n = 6); values with each sample marked by different letters within the same row are significant different ( $P < 0.05$ ).

Table S2. Relative concentrations of volatile compounds in six different orange juices (mg/L)

| Compound                     | RI (FFAP) | 1804                          | Blue                          | CH                            | FG                            | SW                            | Volk                           |
|------------------------------|-----------|-------------------------------|-------------------------------|-------------------------------|-------------------------------|-------------------------------|--------------------------------|
| Alcohol                      |           |                               |                               |                               |                               |                               |                                |
| 2-octenol                    | 1155      | 0.6739 ± 0.084 <sup>a</sup>   | 0.4153 ± 0.1115 <sup>b</sup>  | 0.3723 ± 0.0495 <sup>c</sup>  | 0.5665 ± 0.0878 <sup>a</sup>  | 0.7627 ± 0.109 <sup>a</sup>   | 0.8217 ± 0.0271 <sup>d</sup>   |
| 1-hexanol                    | 868       | 0.0219 ± 0.0042 <sup>a</sup>  | 0.0312 ± 0.0066 <sup>b</sup>  | 0.0512 ± 0.0081 <sup>c</sup>  | 0.0148 ± 0.0015 <sup>d</sup>  | 0.0185 ± 0.0074 <sup>d</sup>  | 0.0169 ± 0.0053 <sup>ad</sup>  |
| linalool                     | 1099      | 12.8762 ± 0.3339 <sup>a</sup> | 9.5226 ± 0.7756 <sup>c</sup>  | 7.9941 ± 0.6572 <sup>c</sup>  | 12.0111 ± 1.3631 <sup>a</sup> | 11.9784 ± 1.0647 <sup>a</sup> | 13.4538 ± 0.6397 <sup>a</sup>  |
| 1-octanol                    | 1071      | 1.0392 ± 0.1844 <sup>a</sup>  | 1.0878 ± 0.1759 <sup>a</sup>  | 0.8887 ± 0.0857 <sup>a</sup>  | 0.5769 ± 0.1676 <sup>b</sup>  | 0.9952 ± 0.3096 <sup>a</sup>  | 0.5686 ± 0.0987 <sup>b</sup>   |
| terpinen-4-ol                | 922       | 3.0136 ± 1.4673 <sup>a</sup>  | 1.9255 ± 0.1341 <sup>b</sup>  | 1.2227 ± 0.1415 <sup>c</sup>  | 3.2534 ± 0.4068 <sup>a</sup>  | 2.9355 ± 0.1635 <sup>a</sup>  | 3.0788 ± 0.1827 <sup>a</sup>   |
| dihydrocarveol               | 1192      | 0.1089 ± 0.0261 <sup>a</sup>  | 0.1395 ± 0.0512 <sup>ab</sup> | 0.1063 ± 0.0176 <sup>a</sup>  | 0.0857 ± 0.0648 <sup>a</sup>  | 0.1165 ± 0.0372 <sup>a</sup>  | 0.1566 ± 0.0301 <sup>b</sup>   |
| carveol                      | 1219      | 0.0964 ± 0.0173 <sup>a</sup>  | 0.0902 ± 0.018 <sup>a</sup>   | 0.0891 ± 0.0226 <sup>a</sup>  | 0.0459 ± 0.0232 <sup>b</sup>  | 0.0883 ± 0.0242 <sup>a</sup>  | 0.088 ± 0.0124 <sup>a</sup>    |
| carotol                      | 1594      | 0.2945 ± 0.0626 <sup>a</sup>  | 0.3912 ± 0.0726 <sup>b</sup>  | 0.3932 ± 0.0759 <sup>b</sup>  | 0.1928 ± 0.0992 <sup>a</sup>  | 0.4 ± 0.0853 <sup>b</sup>     | 0.3657 ± 0.0428 <sup>b</sup>   |
| terpineol                    | 1189      | 1.4207 ± 0.0809 <sup>a</sup>  | 1.2357 ± 0.0721 <sup>b</sup>  | 0.8933 ± 0.1127 <sup>b</sup>  | 1.3799 ± 0.2096 <sup>b</sup>  | 1.2308 ± 0.1038 <sup>b</sup>  | 1.5525 ± 0.1381 <sup>b</sup>   |
| <i>trans</i> -isopiperitenol | 1210      | 0.1286 ± 0.0752               | 0.1371 ± 0.0488               | 0.1195 ± 0.0222               | 0.0835 ± 0.0938               | 0.0899 ± 0.0628               | 0.1528 ± 0.0364                |
| citronellol                  | 1228      | 0.0798 ± 0.0071 <sup>a</sup>  | 0.0904 ± 0.0215 <sup>a</sup>  | 0.0561 ± 0.0222 <sup>b</sup>  | 0.0402 ± 0.0169 <sup>b</sup>  | 0.0724 ± 0.0162 <sup>a</sup>  | 0.0878 ± 0.0109 <sup>a</sup>   |
| nerol                        | 1235      | 0.1256 ± 0.0227 <sup>a</sup>  | 0.0778 ± 0.0222 <sup>b</sup>  | 0.0441 ± 0.0199 <sup>c</sup>  | 0.0573 ± 0.0383 <sup>bc</sup> | 0.1144 ± 0.0215 <sup>a</sup>  | 0.1014 ± 0.0229 <sup>ab</sup>  |
| <i>cis</i> -carveol          | 1230      | 0.1197 ± 0.0381 <sup>a</sup>  | 0.1284 ± 0.0504 <sup>a</sup>  | 0.1152 ± 0.0338 <sup>ab</sup> | 0.0718 ± 0.0344 <sup>b</sup>  | 0.1217 ± 0.0389 <sup>a</sup>  | 0.158 ± 0.0369 <sup>a</sup>    |
| Aldehyde                     |           |                               |                               |                               |                               |                               |                                |
| hexanal                      | 800       | 0.2437 ± 0.0126 <sup>a</sup>  | 0.2892 ± 0.0246 <sup>b</sup>  | 0.3205 ± 0.0747 <sup>b</sup>  | 0.1857 ± 0.0268 <sup>c</sup>  | 0.2414 ± 0.0196 <sup>a</sup>  | 0.3333 ± 0.0122 <sup>b</sup>   |
| octanal                      | 1071      | 1.5269 ± 0.2469 <sup>a</sup>  | 0.9043 ± 0.1101 <sup>b</sup>  | 0.4336 ± 0.0646 <sup>c</sup>  | 1.4903 ± 0.1798 <sup>a</sup>  | 1.3019 ± 0.1024 <sup>a</sup>  | 1.353 ± 0.104 <sup>a</sup>     |
| nonanal                      | 1104      | 0.2682 ± 0.0523 <sup>a</sup>  | 0.1941 ± 0.0566 <sup>b</sup>  | 0.1129 ± 0.0466 <sup>c</sup>  | 0.1933 ± 0.0763 <sup>a</sup>  | 0.3043 ± 0.0404 <sup>a</sup>  | 0.2989 ± 0.0575 <sup>a</sup>   |
| decanal                      | 1206      | 0.8756 ± 0.1696 <sup>a</sup>  | 0.4872 ± 0.1236 <sup>b</sup>  | 0.2943 ± 0.0721 <sup>c</sup>  | 0.545 ± 0.2171 <sup>b</sup>   | 0.674 ± 0.1491 <sup>a</sup>   | 0.6953 ± 0.0902 <sup>a</sup>   |
| perilla aldehyde             | 1272      | 0.8943 ± 0.1199 <sup>a</sup>  | 0.331 ± 0.0682 <sup>b</sup>   | 0.2237 ± 0.0858 <sup>c</sup>  | 0.6932 ± 0.1912 <sup>a</sup>  | 0.6515 ± 0.112 <sup>a</sup>   | 0.766 ± 0.0918 <sup>a</sup>    |
| citral                       | 1276      | 0.0826 ± 0.0235 <sup>a</sup>  | 0.0705 ± 0.0298 <sup>ab</sup> | 0.0638 ± 0.0187 <sup>ac</sup> | 0.0458 ± 0.0217 <sup>c</sup>  | 0.0767 ± 0.0447 <sup>a</sup>  | 0.1078 ± 0.0315 <sup>a</sup>   |
| Ester                        |           |                               |                               |                               |                               |                               |                                |
| methyl butyrate              | 772       | 0.0204 ± 0.0021 <sup>a</sup>  | 0.0326 ± 0.0036 <sup>b</sup>  | 0.0383 ± 0.011 <sup>c</sup>   | 0.0094 ± 0.0015 <sup>a</sup>  | 0.0411 ± 0.0091 <sup>d</sup>  | 0.0279 ± 0.0039 <sup>d</sup>   |
| ethyl butyrate               | 802       | 0.1363 ± 0.011 <sup>a</sup>   | 0.1884 ± 0.0241 <sup>b</sup>  | 0.176 ± 0.0411 <sup>ac</sup>  | 0.1216 ± 0.0289 <sup>ac</sup> | 0.1234 ± 0.0208 <sup>d</sup>  | 0.1937 ± 0.0168 <sup>abc</sup> |

|                                                                                                                                                                             |      |                                 |                                |                               |                                 |                                |                                 |
|-----------------------------------------------------------------------------------------------------------------------------------------------------------------------------|------|---------------------------------|--------------------------------|-------------------------------|---------------------------------|--------------------------------|---------------------------------|
| octyl acetate                                                                                                                                                               | 1210 | 0.0168 ± 0.0054 <sup>a</sup>    | 0.0421 ± 0.01 <sup>b</sup>     | 0.0223 ± 0.0066 <sup>ab</sup> | 0.0266 ± 0.0109 <sup>a</sup>    | 0.0219 ± 0.012 <sup>a</sup>    | 0.0278 ± 0.0094 <sup>ab</sup>   |
| perilla acetate                                                                                                                                                             | 1436 | 0.0579 ± 0.018 <sup>a</sup>     | 0.0256 ± 0.0058 <sup>b</sup>   | 0.0147 ± 0.0049 <sup>c</sup>  | 0.0296 ± 0.0196 <sup>b</sup>    | 0.0427 ± 0.0239 <sup>a</sup>   | 0.0531 ± 0.0173 <sup>a</sup>    |
| Ketone                                                                                                                                                                      |      |                                 |                                |                               |                                 |                                |                                 |
| carvone                                                                                                                                                                     | 1204 | 0.445 ± 0.0657 <sup>a</sup>     | 0.5955 ± 0.0555 <sup>b</sup>   | 0.5988 ± 0.0742 <sup>c</sup>  | 0.4325 ± 0.1476 <sup>a</sup>    | 0.4041 ± 0.0362 <sup>a</sup>   | 0.7778 ± 0.0549 <sup>d</sup>    |
| Terpene                                                                                                                                                                     |      |                                 |                                |                               |                                 |                                |                                 |
| $\alpha$ -pinene                                                                                                                                                            | 937  | 0.164 ± 0.0159 <sup>a</sup>     | 0.1463 ± 0.0183 <sup>a</sup>   | 0.0801 ± 0.0157 <sup>b</sup>  | 0.1388 ± 0.0329 <sup>a</sup>    | 0.1538 ± 0.0111 <sup>a</sup>   | 0.1508 ± 0.0124 <sup>a</sup>    |
| $\beta$ -pinene                                                                                                                                                             | 979  | 0.2482 ± 0.132 <sup>a</sup>     | 0.4069 ± 0.0647 <sup>b</sup>   | 0.0716 ± 0.0371 <sup>c</sup>  | 0.3419 ± 0.0494 <sup>ab</sup>   | 0.0513 ± 0.022 <sup>c</sup>    | 0.0264 ± 0.0075 <sup>d</sup>    |
| $\beta$ -myrcene                                                                                                                                                            | 991  | 1.5293 ± 0.3877 <sup>a</sup>    | 0.8814 ± 0.0986 <sup>b</sup>   | 0.9481 ± 0.1882 <sup>c</sup>  | 1.0143 ± 0.4163 <sup>abc</sup>  | 1.8391 ± 0.1094 <sup>a</sup>   | 1.7749 ± 0.1216 <sup>a</sup>    |
| limonene                                                                                                                                                                    | 1030 | 133.0555 ± 27.0634 <sup>a</sup> | 115.1254 ± 5.4412 <sup>a</sup> | 64.4849 ± 4.6203 <sup>b</sup> | 113.3053 ± 22.7497 <sup>a</sup> | 111.5866 ± 8.8735 <sup>a</sup> | 108.4767 ± 11.2714 <sup>a</sup> |
| cosmene                                                                                                                                                                     | 1131 | 0.1124 ± 0.0136 <sup>a</sup>    | 0.081 ± 0.0152 <sup>b</sup>    | 0.0538 ± 0.009 <sup>c</sup>   | 0.0874 ± 0.0261 <sup>ab</sup>   | 0.0974 ± 0.0126 <sup>ab</sup>  | 0.1004 ± 0.0114 <sup>a</sup>    |
| terpinolene                                                                                                                                                                 | 1088 | 0.0896 ± 0.0227 <sup>a</sup>    | 0.0598 ± 0.0082 <sup>b</sup>   | 0.0358 ± 0.0071 <sup>c</sup>  | 0.0607 ± 0.0196 <sup>b</sup>    | 0.0663 ± 0.0112 <sup>a</sup>   | 0.0713 ± 0.017 <sup>a</sup>     |
| <i>p</i> -cymenene                                                                                                                                                          | 1090 | 0.0392 ± 0.0113 <sup>a</sup>    | 0.0419 ± 0.0116 <sup>a</sup>   | 0.0395 ± 0.0084 <sup>a</sup>  | 0.0264 ± 0.0145 <sup>ab</sup>   | 0.0557 ± 0.0288 <sup>a</sup>   | 0.0452 ± 0.0091 <sup>ac</sup>   |
| valencene                                                                                                                                                                   | 1698 | 1.2423 ± 0.4116 <sup>a</sup>    | 1.2121 ± 0.2048 <sup>a</sup>   | 1.6646 ± 0.3225 <sup>b</sup>  | 0.6433 ± 0.4077 <sup>c</sup>    | 1.2203 ± 0.4175 <sup>a</sup>   | 0.7317 ± 0.2564 <sup>c</sup>    |
| Data are expressed as means ± the standard error (n = 6); values with each sample marked by different letters within the same row are significant different ( $P < 0.05$ ). |      |                                 |                                |                               |                                 |                                |                                 |



Table S3. VIP scores of metabolites in OPLS-DA model for discrimination

| Nonvolatile compounds |           |                            |           |
|-----------------------|-----------|----------------------------|-----------|
| Compound              | VIP Score | Compound                   | VIP Score |
| tyrosine              | 1.37      | ferulic acid               | 1.12      |
| abscisic acid         | 1.36      | lysine                     | 1.11      |
| shikimic acid         | 1.33      | maleic acid                | 1.11      |
| alanine               | 1.27      | sorbitol                   | 1.10      |
| tryptophan            | 1.27      | guanosine                  | 1.09      |
| xylose                | 1.22      | glucose 6-phosphate        | 1.08      |
| cytidine              | 1.22      | valine                     | 1.08      |
| arabitol              | 1.22      | cytosine                   | 1.08      |
| methionine            | 1.22      | phenylalanine              | 1.06      |
| malonic acid          | 1.20      | aspartic acid              | 1.05      |
| didymine              | 1.20      | uridine                    | 1.05      |
| glutamine             | 1.18      | threonine                  | 1.05      |
| glutamic acid         | 1.17      | adenosine                  | 1.05      |
| rutin                 | 1.15      | benzoic acid               | 1.04      |
| hesperidin            | 1.14      | glucose                    | 1.03      |
| asparagine            | 1.13      | serine                     | 1.02      |
| Volatile compounds    |           |                            |           |
| Compound              | VIP Score | Compound                   | VIP Score |
| 1-octanol             | 1.32      | citronellol                | 1.12      |
| $\beta$ -pinene       | 1.22      | octyl acetate              | 1.09      |
| carvone               | 1.21      | decanal                    | 1.06      |
| $\beta$ -myrcene      | 1.16      | methyl butyrate            | 1.03      |
| valencene             | 1.15      | carveol                    | 1.01      |
| 1-hexanol             | 1.13      | butanoic acid, ethyl ester | 1.01      |
| nerol                 | 1.13      | <i>p</i> -cymenene         | 1.00      |
